# Supplementary material
Source: MDPI journal article supplement (https://www.mdpi.com/2673-401X/2/3/14)
Supplement: s1 [file s1]

## Supplementary Material

### Unveiling the Different Reactivity of Bent and Linear Three-Atom-Components Participating in [3+2] Cycloaddition Reactions

Mar Ríos-Gutiérrez,<sup>\*a</sup> Luis R. Domingo,<sup>a</sup> Fatemeh Ghodsi<sup>b</sup>

<sup>a</sup> Department of Organic Chemistry, University of Valencia, Dr Moliner 50, 46100 Burjassot, Valencia, Spain

<sup>b</sup> Department of Chemistry, University of Sistan and Baluchestan, Zahedan, Iran

email: [rios@utopia.uv.es](mailto:rios@utopia.uv.es)

#### Index

- S2** Table with the MPWB1K/6-311G(d,p) gas-phase total electronic energies of the stationary points involved in the 32CA reactions of TACs **1-8** with ethylene **9**.
- S3** Table with the MPWB1K/6-311G(d,p) gas-phase total electronic energies of the stationary points involved in the 32CA reactions of TACs **1-8** with DCE **10**.
- S4** Cartesian coordinates of the MPWB1K/6-311G(d,p) gas-phase optimized geometries of the TSs involved in the 32CA reactions of TACs **1-8** with ethylene **9** and DCE **10**.

**Table S1.** MPWB1K/6-311G(d,p) gas-phase total electronic energies, in a.u., of the stationary points involved in the 32CA reactions of TACs **1-8** with ethylene **9**.

|            | <b>TAC</b>  | <b>MC-n</b> | <b>TS-n</b> | <b>CA-n</b> |
|------------|-------------|-------------|-------------|-------------|
| ethylene   | -78.552848  |             |             |             |
| <b>1</b>   | -133.837059 | -212.392758 | -212.389771 | -212.513907 |
| <b>2</b>   | -149.876570 | -228.433098 | -228.419234 | -228.524020 |
| <b>3</b>   | -165.916866 | -244.474252 | -244.444998 | -244.538593 |
| <b>4</b>   | -169.750050 | -248.308204 | -248.284052 | -248.368246 |
| <b>5</b>   | -132.620870 | -211.175604 | -211.162310 | -211.303513 |
| <b>6'</b>  | -148.694350 | -227.248800 | -227.221300 | -227.315090 |
| <b>6''</b> | -148.651349 | -227.205475 | -227.191473 | -227.313995 |
| <b>7</b>   | -164.740775 | -243.298496 | -243.259959 | -243.341410 |
| <b>8</b>   | -168.532259 | -247.087461 | -247.060254 | -247.166050 |

**Table S2.** MPWB1K/6-311G(d,p) gas-phase total electronic energies, in a.u., of the stationary points involved in the 32CA reactions of TACs **1-8** with DCE **10**.

|            | <b>TAC</b>  | <b>MCo-n</b> | <b>TSo-n</b> | <b>CAo-n</b> |
|------------|-------------|--------------|--------------|--------------|
| DCE        | -262.988892 |              |              |              |
| <b>1</b>   | -133.837059 |              |              | -396.947875  |
| <b>2</b>   | -149.876570 | -412.878639  | -412.877304  | -412.944505  |
| <b>3</b>   | -165.916866 | -428.912199  | -428.896290  | -428.964587  |
| <b>4</b>   | -169.750050 | -432.751300  | -432.739455  | -432.797076  |
| <b>5</b>   | -132.620870 | -395.620740  | -395.619747  | -395.731022  |
| <b>6'</b>  | -148.694350 | -411.689624  | -411.665255  | -411.737771  |
| <b>6''</b> | -148.651349 | -411.648530  | -411.638635  | -411.737356  |
| <b>7</b>   | -164.740775 | -427.733598  | -427.694784  | -427.759921  |
| <b>8</b>   | -168.532259 | -431.527581  | -431.496811  | -431.582214  |
|            |             | <b>MCm-n</b> | <b>TSm-n</b> | <b>CAm-n</b> |
| <b>2</b>   |             | -412.874814  | -412.872861  | -412.950873  |
| <b>4</b>   |             | -432.753337  | -432.730784  | -432.789673  |
| <b>5</b>   |             | -395.616378  | -395.612628  | -395.727411  |
| <b>6'</b>  |             | -411.687397  | -411.675887  | -411.732903  |
| <b>6''</b> |             | -411.647858  | -411.639973  | -411.7376652 |
| <b>7</b>   |             | -427.738564  | -427.703604  | -427.759330  |
| <b>8</b>   |             | -431.523606  | -431.499454  | -431.582168  |

**TS-1**

E(RmPW+HF-B95) = -212.389771019 a.u.

Imaginary frequency = -276.6879 cm<sup>-1</sup>

|   |               |               |               |
|---|---------------|---------------|---------------|
| C | -1.5157084150 | 0.6734427878  | -0.0596239800 |
| C | -1.5157054004 | -0.6734479439 | -0.0596271926 |
| C | 0.8927783252  | -1.1869508102 | 0.1988182474  |
| C | 0.8927737083  | 1.1869545989  | 0.1988224951  |
| H | 1.2175078670  | 2.0531642193  | -0.3453986993 |
| H | 0.7026195580  | 1.2644204002  | 1.2516001372  |
| H | -1.7260290532 | 1.2334889627  | 0.8363566085  |
| H | -1.5275811196 | -1.2350935219 | -0.9784206923 |
| H | 1.2175158322  | -2.0531572219 | -0.3454059825 |
| H | 0.7026244840  | -1.2644210539 | 1.2515955843  |
| H | 1.5545108693  | 0.0000057477  | -1.2336511532 |
| N | 1.2422675767  | 0.0000033985  | -0.2793122757 |
| H | -1.7260236311 | -1.2334993503 | 0.8363506639  |
| H | -1.5275866016 | 1.2350927867  | -0.9784147608 |

**TS-2**

E(RmPW+HF-B95) = -228.419234362 a.u.

Imaginary frequency = -448.7598 cm<sup>-1</sup>

|   |               |               |               |
|---|---------------|---------------|---------------|
| C | -1.4227118010 | -0.6303625004 | -0.0609686667 |
| C | -1.3574521165 | 0.7300700663  | -0.0702646962 |
| C | 0.8522760778  | 1.0908875455  | 0.2094266683  |
| N | 0.7633806473  | -1.2348663236 | 0.1349237921  |
| H | 1.5135127539  | -0.1051914534 | -1.2347573436 |
| H | 0.5548403255  | -1.1255796541 | 1.1183424385  |
| H | -1.4760458824 | -1.1955905616 | -0.9738950074 |
| H | -1.6301704506 | 1.2966366133  | 0.8053950244  |
| H | 0.7094801733  | 1.1555142870  | 1.2728514991  |
| H | 1.2220853510  | 1.9615053695  | -0.3048662846 |
| N | 1.2107954653  | -0.0874008043 | -0.2759642301 |
| H | -1.7098342611 | -1.1633270658 | 0.8307142929  |
| H | -1.4002062824 | 1.2732494817  | -1.0000194868 |

**TS-3**

E(RmPW+HF-B95) = -244.444996876 a.u.

Imaginary frequency = -572.2743 cm<sup>-1</sup>

|   |               |               |               |
|---|---------------|---------------|---------------|
| C | 1.2995902239  | 0.6876369168  | -0.0638179214 |
| C | 1.2995918446  | -0.6876338771 | -0.0638181637 |
| N | -0.7595400005 | -1.1476698590 | 0.1425827583  |
| N | -0.7595423169 | 1.1476681649  | 0.1425836129  |
| H | -1.4351157889 | -0.0000010398 | -1.2495499195 |
| H | -0.6141462532 | 1.0626621005  | 1.1399158953  |
| H | 1.3825349747  | 1.2348553910  | -0.9861879471 |
| H | 1.6140742734  | -1.2291905855 | 0.8139622355  |
| H | -0.6141441016 | -1.0626642663 | 1.1399151216  |
| N | -1.1864452466 | -0.0000011053 | -0.2740829175 |
| H | 1.6140715340  | 1.2291940505  | 0.8139626018  |
| H | 1.3825378571  | -1.2348518906 | -0.9861883562 |

**TS-4**

E(RmPW+HF-B95) = -248.284052056 a.u.

Imaginary frequency = -509.7225 cm<sup>-1</sup>

|   |               |               |               |
|---|---------------|---------------|---------------|
| C | -1.3493195181 | -0.6447922733 | 0.0068598994  |
| C | -1.3125839954 | 0.7169268104  | 0.1214316113  |
| C | 0.7970115261  | 1.0636952112  | -0.2325939215 |
| O | 0.6880351649  | -1.1555601650 | -0.2060072589 |
| H | -1.4058945666 | -1.2762440749 | 0.8756804489  |
| H | -1.3809626296 | 1.1786349940  | 1.0935934156  |
| H | 1.1393298245  | 1.9531830367  | 0.2701980542  |
| N | 1.2027720557  | -0.0906264583 | 0.2478707136  |
| H | -1.6288349092 | 1.3342837803  | -0.7036787178 |
| H | -1.5885383989 | -1.1160886010 | -0.9297048349 |
| H | 0.6176105580  | 1.1004098114  | -1.2902047932 |
| H | 1.5062378886  | -0.1101500715 | 1.2136953833  |

**TS-5**

E(RmPW+HF-B95) = -211.162310439 a.u.

Imaginary frequency = -424.2173 cm<sup>-1</sup>

|   |               |               |               |
|---|---------------|---------------|---------------|
| C | 1.4086021089  | -0.6785978221 | -0.0000946179 |
| C | 1.4566562542  | 0.6707431014  | -0.0000475339 |
| C | -0.8540750477 | 1.2409951672  | 0.0000872169  |
| C | -0.9760356176 | -1.1530468630 | 0.0000058235  |
| H | 1.5146481181  | -1.2364949477 | 0.9154469778  |
| H | 1.5969352111  | 1.2249968177  | -0.9127541940 |
| H | -1.4894530331 | 2.1184236183  | 0.0001507653  |
| H | -1.0780566751 | -1.6925086594 | -0.9268213432 |
| H | -1.0779649103 | -1.6925763251 | 0.9268036945  |
| H | 1.5145574988  | -1.2364277775 | -0.9156876310 |
| N | -1.2615592859 | 0.1067528014  | 0.0000659364  |
| H | 1.5970253788  | 1.2249298888  | 0.9126859055  |

**TS-6'**

E(RmPW+HF-B95) = -227.221300270 a.u.

Imaginary frequency = -535.1528 cm<sup>-1</sup>

|   |               |               |               |
|---|---------------|---------------|---------------|
| C | 1.4158728996  | -0.5810951482 | 0.0000033688  |
| C | 1.2253346372  | 0.7691121659  | -0.0001029937 |
| C | -0.9428975096 | 1.0444585446  | -0.0000571780 |
| N | -0.7450092139 | -1.2981132739 | 0.0001322746  |
| H | -1.2347273798 | 1.5402898783  | 0.9134859374  |
| H | -1.2347853448 | 1.5401368191  | -0.9136648368 |
| H | 1.3580568467  | 1.3321538692  | -0.9097870860 |
| H | 1.6135270950  | -1.1152766804 | 0.9136933783  |
| N | -1.2093995534 | -0.2614147296 | 0.0000605338  |
| H | 1.3581146523  | 1.3323053430  | 0.9094788966  |
| H | 1.6134688709  | -1.1154287880 | -0.9136102951 |

**TS-6''**

E(RmPW+HF-B95) = -227.191472518 a.u.

Imaginary frequency = -433.3003 cm<sup>-1</sup>

|   |             |             |             |
|---|-------------|-------------|-------------|
| N | 0.00000000  | 0.00000000  | 1.19481275  |
| N | 0.73132286  | 0.00000000  | 2.20194385  |
| H | 0.42448022  | -0.71663097 | 2.85043239  |
| H | -0.68501289 | 0.38650336  | -0.72819693 |
| C | 2.22775030  | -0.33057099 | -0.31394334 |
| C | 2.69135964  | -0.39807816 | 0.95367924  |
| H | 2.84848251  | -1.34731611 | 1.43796652  |
| H | 3.08824321  | 0.46679300  | 1.45340020  |
| H | 2.04791575  | -1.22482239 | -0.88631995 |
| H | 2.30386349  | 0.58752087  | -0.87535581 |

**TS-7**

E(RmPW+HF-B95) = -243.259959411 a.u.

Imaginary frequency = -557.7752 cm<sup>-1</sup>

|   |               |               |               |
|---|---------------|---------------|---------------|
| C | -1.3133272946 | -0.6091869634 | 0.0046274970  |
| C | -1.2116188642 | 0.7565829151  | 0.0143958820  |
| N | 0.8639061681  | 1.0083155250  | -0.1039535987 |
| N | 0.7037120271  | -1.2245791313 | 0.0012570077  |
| H | -1.5303092254 | -1.1278789539 | -0.9137582278 |
| H | -1.3313836316 | 1.3038080457  | 0.9347546458  |
| H | 1.4427655068  | 1.6311477771  | 0.4422185094  |
| N | 1.2053152294  | -0.1916010411 | 0.0186848085  |
| H | -1.3549031663 | 1.3229019383  | -0.8884594351 |
| H | -1.5190037494 | -1.1475141114 | 0.9132229114  |

**TS-8**

E(RmPW+HF-B95) = -247.060253902 a.u.

Imaginary frequency = -516.4676 cm<sup>-1</sup>

|   |               |               |               |
|---|---------------|---------------|---------------|
| C | -1.3277972094 | -0.7061594774 | 0.0000042818  |
| C | -1.3383708922 | 0.6488802156  | 0.0000250687  |
| C | 0.7651088125  | 1.1438682205  | 0.0000086140  |
| O | 0.9395714186  | -1.1128626377 | -0.0000277750 |
| H | -1.3927342171 | -1.2674295166 | 0.9153588627  |
| H | -1.5207004908 | 1.1878143142  | 0.9162690447  |
| H | 1.0763422941  | 2.1636119001  | 0.0000205930  |
| N | 1.2342566550  | 0.0509273154  | -0.0000134092 |
| H | -1.5207213291 | 1.1878422482  | -0.9161983298 |
| H | -1.3927550414 | -1.2674015823 | -0.9153659510 |

**TSo-2**

E(RmPW+HF-B95) = -412.877304061 a.u.

Imaginary frequency = -234.7809 cm<sup>-1</sup>

|   |               |               |               |
|---|---------------|---------------|---------------|
| C | -0.1264971299 | -0.1902310597 | 1.5422889487  |
| C | 0.7661981895  | 0.0269784202  | 0.5244628870  |
| C | -1.1703990087 | -0.0587738830 | -1.4644413571 |
| N | -2.0104591496 | -0.5281184513 | 0.6764241429  |
| H | -2.2873197251 | 1.1043136195  | -0.3359049729 |
| H | -1.7328354097 | -1.4717927227 | 0.4336089442  |
| H | -0.4742195874 | 0.6424423466  | 2.1254241878  |
| H | -0.7377886107 | -1.0346628747 | -1.5937352436 |

|   |               |               |               |
|---|---------------|---------------|---------------|
| H | -1.1268137404 | 0.6858684864  | -2.2367878905 |
| N | -1.8934656272 | 0.1788848708  | -0.4188225000 |
| H | -0.1588454052 | -1.1529019375 | 2.0212060645  |
| C | 1.4211511392  | -1.0607092537 | -0.1037428344 |
| C | 1.0593012393  | 1.3476419706  | 0.0981893070  |
| N | 1.8996045564  | -1.9698538682 | -0.6127266807 |
| N | 1.2608682695  | 2.4312983368  | -0.2168000028 |

**TSo-3**

E(RmPW+HF-B95) = -428.896289962 a.u.

Imaginary frequency = -385.7188 cm<sup>-1</sup>

|   |               |               |               |
|---|---------------|---------------|---------------|
| C | 0.3016224203  | -0.0072272616 | 1.4375281961  |
| C | -0.6963315132 | 0.0716518351  | 0.4567343025  |
| N | 1.0813200330  | -0.2339527793 | -1.4597003967 |
| N | 1.9464217386  | 0.1226498308  | 0.6430783875  |
| H | 2.0706972163  | -1.5080412633 | -0.4349323420 |
| H | 1.8678953753  | 1.1065574808  | 0.4132747370  |
| H | 0.4030651162  | -0.9475847018 | 1.9528839395  |
| H | 0.8376433282  | 0.7519987770  | -1.4002760623 |
| N | 1.7966919874  | -0.5357887530 | -0.4790255560 |
| H | 0.4496844651  | 0.8527033997  | 2.0711662769  |
| C | -1.0585808063 | 1.3399893172  | -0.0446212997 |
| C | -1.3948771519 | -1.0861985307 | 0.0466683706  |
| N | -1.2395680058 | 2.3931243201  | -0.4645772680 |
| N | -1.9424562033 | -2.0521796709 | -0.2385352854 |

**TSo-4**

E(RmPW+HF-B95) = -432.739455298 a.u.

Imaginary frequency = -351.4132 cm<sup>-1</sup>

|   |               |               |               |
|---|---------------|---------------|---------------|
| C | -0.9506543409 | -0.4231626814 | -1.4059013847 |
| N | -1.8511276307 | -0.1152040252 | -0.5392429396 |
| O | -1.8362623566 | -0.6576132977 | 0.6303291194  |
| H | -2.3562809840 | 0.7569270551  | -0.6252588174 |
| H | -0.4502599689 | -1.3697346118 | -1.3200366377 |
| H | -0.8701138704 | 0.1797009842  | -2.2934256574 |
| C | 0.6398956459  | 0.1145033918  | 0.4484663836  |
| C | -0.3291896042 | -0.2402980266 | 1.4030513223  |
| H | -0.7108792142 | 0.5538631220  | 2.0226614791  |
| H | -0.1935028505 | -1.1786681354 | 1.9121622881  |
| C | 0.7842000353  | 1.4734033076  | 0.0840428361  |
| N | 0.8244704172  | 2.5827443705  | -0.2061419584 |
| C | 1.5853640124  | -0.8340850355 | 0.0002020245  |
| N | 2.3014087094  | -1.6450274175 | -0.3813170576 |

**TSo-5**

E(RmPW+HF-B95) = -395.619746485 a.u.

Imaginary frequency = -217.4932 cm<sup>-1</sup>

|   |               |              |              |
|---|---------------|--------------|--------------|
| C | 0.7411439296  | 0.0000036235 | 0.5700079344 |
| C | -0.1108163585 | 0.0000105610 | 1.6293915364 |
| C | -2.2086060475 | 0.0000010278 | 0.6894433501 |

|   |               |               |               |
|---|---------------|---------------|---------------|
| C | -1.2210520943 | -0.0000145926 | -1.5386234422 |
| H | -0.3265413783 | 0.9189045066  | 2.1436964911  |
| H | -3.2351127591 | 0.0000023746  | 1.0345748019  |
| H | -0.9784124113 | 0.9397522711  | -2.0062021208 |
| H | -0.9784102062 | -0.9397880183 | -2.0061877960 |
| N | -1.9133627123 | -0.0000074380 | -0.4810385097 |
| H | -0.3265391606 | -0.9188761779 | 2.1437102994  |
| C | 1.1985478631  | 1.2194495809  | 0.0046840756  |
| C | 1.1985507752  | -1.2194497346 | 0.0047023957  |
| N | 1.5450606360  | 2.2173477344  | -0.4387161641 |
| N | 1.5450659243  | -2.2173537244 | -0.4386828520 |

**TSo-6'**

E(RmPW+HF-B95) = -411.665254571 a.u.

Imaginary frequency = -505.5970 cm<sup>-1</sup>

|   |               |               |               |
|---|---------------|---------------|---------------|
| C | 0.4361715143  | 0.0000007179  | 1.4472430483  |
| C | -0.4981291044 | -0.0000001156 | 0.4187325915  |
| C | 0.9027833811  | -0.0000021834 | -1.4025617218 |
| N | 2.2091649841  | -0.0000003311 | 0.5389729865  |
| H | 0.7290092743  | -0.9290639826 | -1.9226643440 |
| H | 0.7290179259  | 0.9290691546  | -1.9226512217 |
| H | 0.6094502418  | -0.9139277829 | 1.9882392690  |
| N | 1.9156461541  | -0.0000030452 | -0.5671865899 |
| H | 0.6094504599  | 0.9139302292  | 1.9882375010  |
| C | -1.1447239726 | 1.2174792183  | 0.0538430090  |
| C | -1.1447242329 | -1.2174799084 | 0.0538450162  |
| N | -1.6297755176 | 2.2111026341  | -0.2411250315 |
| N | -1.6297761080 | -2.2111036117 | -0.2411215126 |

**TSo-6''**

E(RmPW+HF-B95) = -411.638635090 a.u.

Imaginary frequency = -405.1736 cm<sup>-1</sup>

|   |             |             |             |
|---|-------------|-------------|-------------|
| H | 0.31549970  | -0.72046031 | 2.86120116  |
| H | -0.48335228 | 0.28353260  | -0.90722455 |
| C | 2.45085288  | -0.49782287 | 0.17608967  |
| C | 2.52960136  | -0.40885432 | 1.54816364  |
| H | 2.62985368  | -1.31797402 | 2.11502398  |
| H | 2.93074957  | 0.48512523  | 1.98816050  |
| C | 2.29720669  | -1.76283056 | -0.45388993 |
| N | 2.16864247  | -2.79378933 | -0.93562703 |
| C | 2.74219697  | 0.62628308  | -0.64408486 |
| N | 2.96676498  | 1.54276765  | -1.29331391 |

**TSo-7**

E(RmPW+HF-B95) = -427.694783876 a.u.

Imaginary frequency = -558.6975 cm<sup>-1</sup>

|   |               |               |               |
|---|---------------|---------------|---------------|
| C | 0.4898361448  | -0.1202234474 | 1.3846722498  |
| C | -0.4717916790 | -0.0000834431 | 0.3819487360  |
| H | 0.5816970684  | -1.0725846804 | 1.8780713796  |
| H | 0.8327913214  | 0.6652007052  | -2.0001781431 |



|   |               |               |               |
|---|---------------|---------------|---------------|
| N | 2.1734875180  | -0.1907781195 | 0.4966548106  |
| N | 1.8836193205  | -0.0637023043 | -0.6130845369 |
| N | 0.8596104544  | -0.0815910488 | -1.3147643692 |
| H | 0.7130682561  | 0.7473174451  | 1.9799410425  |
| C | -1.2405177132 | -1.1387543140 | -0.0044047829 |
| C | -1.0267715484 | 1.2830311186  | 0.0939646696  |
| N | -1.4414114594 | 2.3238428054  | -0.1356170684 |
| N | -1.8557156835 | -2.0604217170 | -0.2836109876 |

**TSo-8**

E(RmPW+HF-B95) = -431.496811089 a.u.

Imaginary frequency = -561.0326 cm<sup>-1</sup>

|   |               |               |               |
|---|---------------|---------------|---------------|
| C | 0.4685356873  | 0.0000668706  | -1.4002831528 |
| C | -0.4970110627 | 0.0000083188  | -0.4080028061 |
| C | 0.8711973515  | -0.0000910982 | 1.3871521280  |
| O | 2.1908781767  | 0.0000141359  | -0.4446022701 |
| H | 0.6932924443  | -0.9181628061 | -1.9112276070 |
| H | 0.4575992604  | -0.0001471885 | 2.3702237434  |
| N | 1.8427760588  | -0.0000521359 | 0.7194911049  |
| H | 0.6932896055  | 0.9183559491  | -1.9111220972 |
| C | -1.1564933309 | -1.2171000780 | -0.0576153033 |
| C | -1.1564974736 | 1.2170743288  | -0.0574757335 |
| N | -1.6698190360 | -2.1982662530 | 0.2285686392  |
| N | -1.6698266814 | 2.1982059566  | 0.2288203545  |

**TSm-2**

E(RmPW+HF-B95) = -412.872860925 a.u.

Imaginary frequency = -246.7207 cm<sup>-1</sup>

|   |               |               |               |
|---|---------------|---------------|---------------|
| C | -0.7367567592 | 0.0337664451  | 0.5107786950  |
| C | 0.1500494335  | -0.1086573557 | 1.5387106882  |
| C | 2.1588245343  | -0.4295841401 | 0.5245205253  |
| N | 0.9623557674  | -0.0922767190 | -1.4587955764 |
| H | 2.1669514908  | 1.1634074786  | -0.6782417102 |
| H | 0.7025661429  | -1.0634003654 | -1.3152232079 |
| H | 0.2318261130  | -1.0557705984 | 2.0415108482  |
| H | 2.0079762588  | -1.4938598623 | 0.5296947726  |
| H | 2.9457249747  | -0.0036699691 | 1.1195192932  |
| N | 1.8403707180  | 0.2113382564  | -0.5908347217 |
| H | 0.4781812281  | 0.7627742483  | 2.0763159837  |
| C | -1.3955821348 | -1.1000695017 | -0.0309709675 |
| C | -1.0927118246 | 1.3300385787  | 0.0520499127  |
| N | -1.8757942025 | -2.0496050873 | -0.4552070078 |
| N | -1.3499177406 | 2.4012185919  | -0.2594215274 |

**TSm-4**

E(RmPW+HF-B95) = -432.730784123 a.u.

Imaginary frequency = -430.9572 cm<sup>-1</sup>

|   |              |               |               |
|---|--------------|---------------|---------------|
| C | 2.0098108567 | -0.7022937491 | 0.4113299157  |
| N | 1.7934347489 | 0.0696287434  | -0.6411640092 |
| O | 0.7843716290 | -0.1131258513 | -1.3387872523 |

|   |               |               |               |
|---|---------------|---------------|---------------|
| H | 2.2154249885  | 0.9939996474  | -0.6693306381 |
| H | 1.7378254473  | -1.7341473055 | 0.2806017096  |
| H | 2.8667280694  | -0.4617818657 | 1.0179442897  |
| C | 0.2932809627  | -0.2657907734 | 1.4344219392  |
| C | -0.6342602874 | 0.0409771974  | 0.4560323797  |
| H | 0.2148372837  | -1.2222798172 | 1.9227056484  |
| H | 0.6708776246  | 0.5415469652  | 2.0384437889  |
| C | -0.8714641082 | 1.4034849333  | 0.1364031184  |
| N | -1.0033733564 | 2.5224689570  | -0.0675350917 |
| C | -1.5004954989 | -0.9546280817 | -0.0623265014 |
| N | -2.1854693599 | -1.7852249998 | -0.4492832969 |

**TSm-5**

E(RmPW+HF-B95) = -395.612629670 a.u.

Imaginary frequency = -297.3054 cm<sup>-1</sup>

|   |               |               |               |
|---|---------------|---------------|---------------|
| C | 0.6576662225  | 0.0000000736  | -0.5073538195 |
| C | -0.2587317071 | 0.0000001933  | -1.5124671973 |
| C | -2.3727704889 | -0.0000000121 | -0.4695998527 |
| C | -0.9536365639 | -0.0000002930 | 1.4912397042  |
| H | -0.4991497128 | -0.9212060053 | -2.0113890018 |
| H | -2.7849124465 | -0.9290977855 | -0.8246825724 |
| N | -1.8459606588 | -0.0000001680 | 0.7138483996  |
| H | -0.4991497861 | 0.9212065162  | -2.0113887362 |
| C | 1.2150076784  | -1.2200477634 | -0.0301008488 |
| C | 1.2150075669  | 1.2200478307  | -0.0301004725 |
| N | 1.6533110037  | -2.2160301334 | 0.3253900802  |
| N | 1.6533108005  | 2.2160301302  | 0.3253907677  |
| H | -2.7849124229 | 0.9290978658  | -0.8246823257 |
| H | -0.8905964851 | -0.0000004447 | 2.5643778753  |

**TSm-6'**

E(RmPW+HF-B95) = -411.675886508 a.u.

Imaginary frequency = -404.5719 cm<sup>-1</sup>

|   |               |               |               |
|---|---------------|---------------|---------------|
| C | 0.6573460571  | -0.0000372566 | 0.4807619518  |
| C | -0.3534311506 | -0.0000562860 | 1.4241038035  |
| C | -2.2069264916 | 0.0000088508  | 0.5155382840  |
| N | -1.0175990862 | 0.0000687182  | -1.5582475072 |
| H | -2.7112994454 | -0.9160982260 | 0.7805067681  |
| H | -2.7112695900 | 0.9161119259  | 0.7805773324  |
| H | -0.5313798453 | 0.9123395425  | 1.9675429946  |
| N | -1.7819442418 | 0.0000502703  | -0.7494700590 |
| H | -0.5314100849 | -0.9124872278 | 1.9674741730  |
| C | 1.2156250048  | 1.2221900049  | 0.0335942057  |
| C | 1.2155817539  | -1.2222493933 | 0.0334987441  |
| N | 1.6354710392  | 2.2339275962  | -0.3033076463 |
| N | 1.6353920808  | -2.2339755191 | -0.3034820448 |

**TSm-6''**

E(RmPW+HF-B95) = -411.639973398 a.u.

Imaginary frequency = -375.0976 cm<sup>-1</sup>

|   |               |               |               |
|---|---------------|---------------|---------------|
| C | -2.1896582230 | -0.2797059224 | 0.5568207906  |
| N | -1.8746987275 | -0.0760390346 | -0.5754993017 |
| N | -1.0366163862 | 0.0092586806  | -1.4609817834 |
| H | -1.0023772862 | 0.9560480030  | -1.8322192508 |
| H | -3.1157937295 | -0.5749895767 | 1.0088077753  |
| C | 0.6383083873  | -0.0121272388 | 0.5109027406  |
| C | -0.2778122264 | -0.1930788267 | 1.5126488167  |
| H | -0.3811225290 | -1.1718803513 | 1.9498244566  |
| H | -0.5631320053 | 0.6488818477  | 2.1183992821  |
| C | 1.3132071808  | -1.1188906299 | -0.0685746129 |
| N | 1.8585536424  | -2.0288814530 | -0.4975918812 |
| C | 1.0240166922  | 1.2992193381  | 0.1247147756  |
| N | 1.2964042105  | 2.3711241639  | -0.1735768075 |

**TSm-7**

E(RmPW+HF-B95) = -427.703603603 a.u.

Imaginary frequency = -524.0206 cm<sup>-1</sup>

|   |               |               |               |
|---|---------------|---------------|---------------|
| C | 0.5625459710  | 0.0247472110  | 0.4069185096  |
| C | -0.4407623002 | -0.0879151160 | 1.3709995252  |
| N | -2.0624109093 | -0.2530371967 | 0.4872864494  |
| N | -0.9548878827 | -0.0683876894 | -1.4814311740 |
| H | -0.6748748991 | 0.7972156942  | 1.9396282266  |
| H | -2.8510258087 | 0.3013225540  | 0.7890958458  |
| N | -1.7960261624 | -0.0988215997 | -0.7322565484 |
| H | -0.5079430341 | -1.0176894619 | 1.9083865300  |
| C | 1.3030858016  | -1.1203634724 | 0.0162766094  |
| C | 1.0422110049  | 1.3090564543  | 0.0432522407  |
| N | 1.8824088462  | -2.0625979560 | -0.2792244502 |
| N | 1.3946213729  | 2.3646215786  | -0.2268177640 |

**TSm-8**

E(RmPW+HF-B95) = -431.499453503 a.u.

Imaginary frequency = -508.4754 cm<sup>-1</sup>

|   |               |               |               |
|---|---------------|---------------|---------------|
| C | -0.5814627112 | 0.0000016012  | 0.4711434927  |
| C | 0.3940441618  | -0.0000007856 | 1.4403158282  |
| C | 2.1843981506  | -0.0000050620 | 0.4858062361  |
| O | 0.9450895526  | -0.0000019367 | -1.4173055290 |
| H | 0.5833427376  | -0.9200106342 | 1.9681426711  |
| H | 3.0890628265  | -0.0000074222 | 1.0523277165  |
| N | 1.8493456718  | -0.0000042270 | -0.6564579168 |
| H | 0.5833471688  | 0.9200081107  | 1.9681427403  |
| C | -1.1651745383 | 1.2203096183  | 0.0370908422  |
| C | -1.1651804125 | -1.2203035723 | 0.0370907447  |
| N | -1.6270934573 | 2.2189658220  | -0.2755493223 |
| N | -1.6271041503 | -2.2189575208 | -0.2755495038 |
